# Supplementary material
Source: PubMed Central journal article supplement (PMC3134286)

**Figure S-1:** (A) ESI-MS spectrum of porcine CaM. 10 pmol of CaM loaded onto a C<sub>8</sub> column, pre-equilibrated with 100  $\mu$ L of 0.2% formic acid in water. The column was then washed with 300  $\mu$ L of 0.2% formic acid in water and CaM was eluted with an isocratic flow 40% Solvent B. The positive ion at  $m/z$  1120.3 corresponds to a +15 charge state. (B) MaxEnt1 decharged spectrum of A. The MW of CaM is  $16789 \pm 1$  Da.

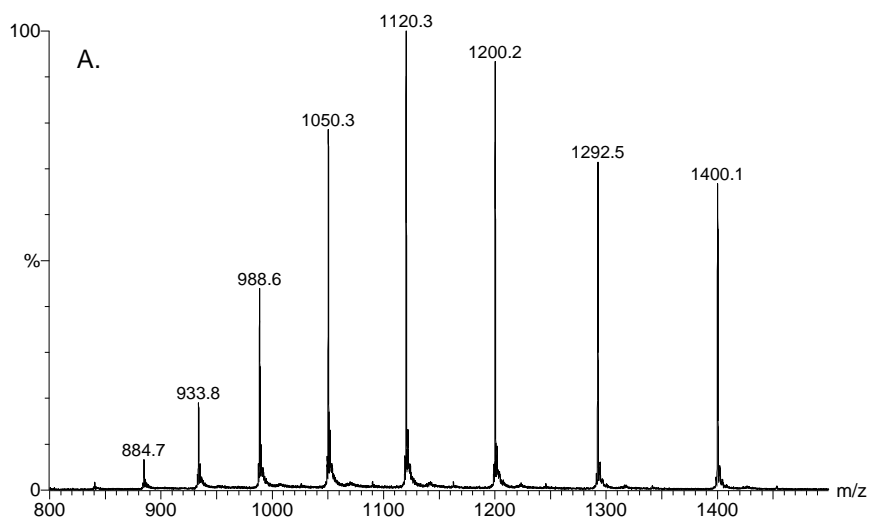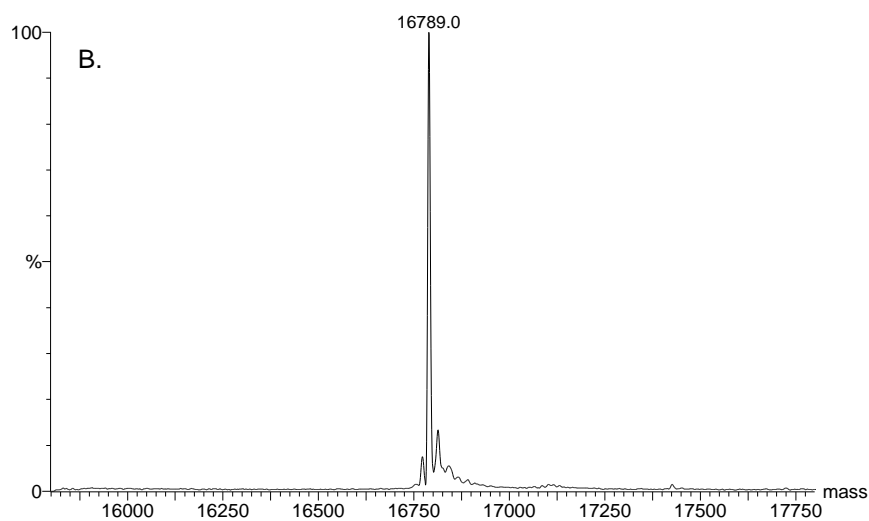

**Figure S-2:** Local H/DX kinetics at four exchange times for residues 124-138 representing EF hand 4 in calmodulin. The undeuterated mass spectrum is provided as a reference for each exchange time. The apo state shows nearly complete exchange at 0.25 min. When calmodulin is bound by  $\text{Ca}^{2+}$  and either melittin or mastoparan, the extent of exchange decreases.

H/DX at 0.25 min

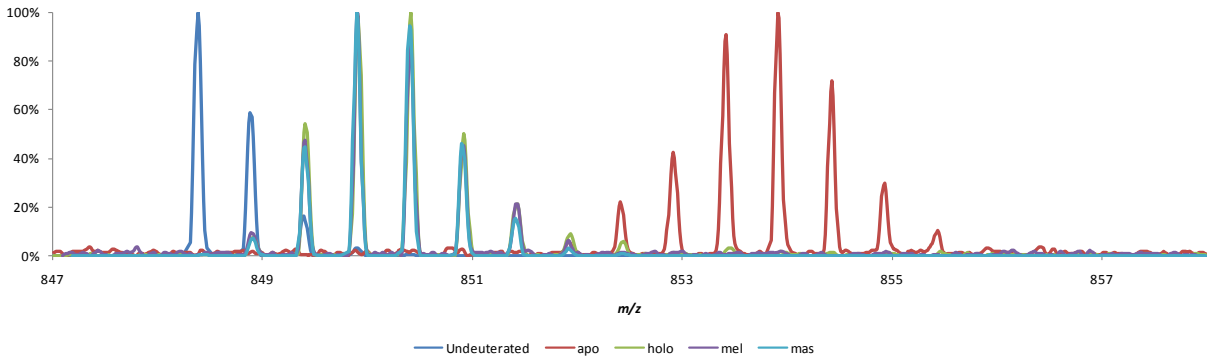

H/DX at 1 min

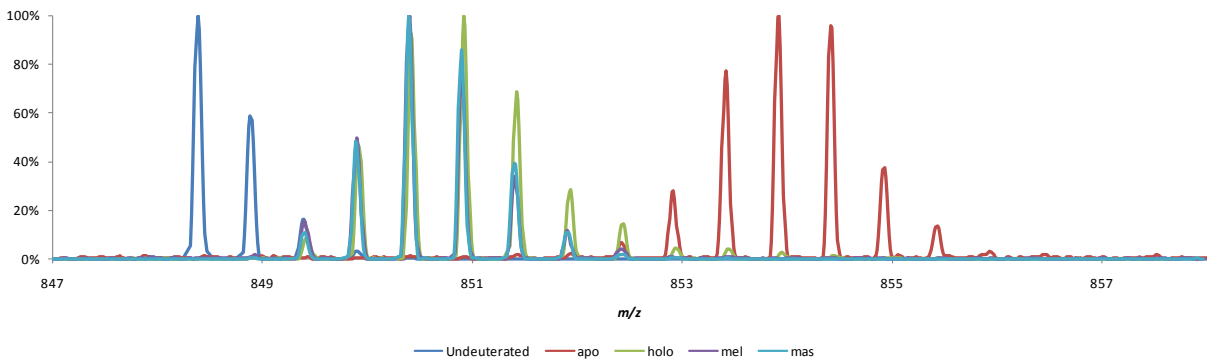

H/DX at 10 min

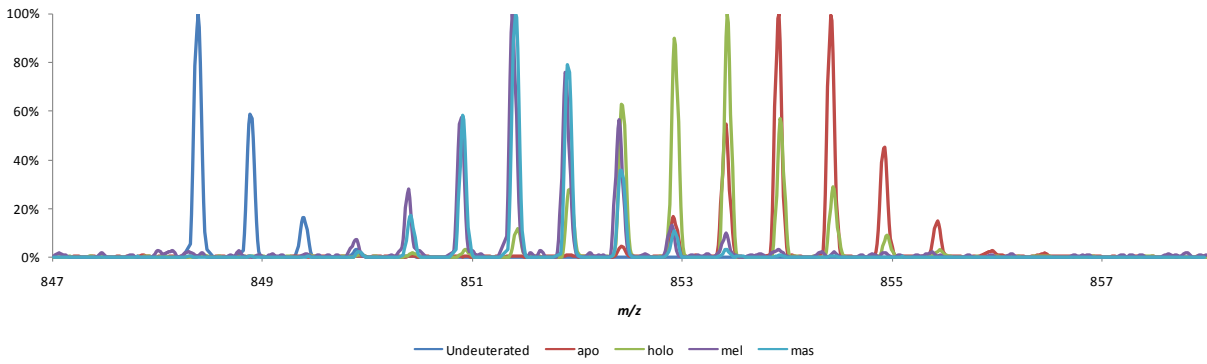

H/DX at 60 min

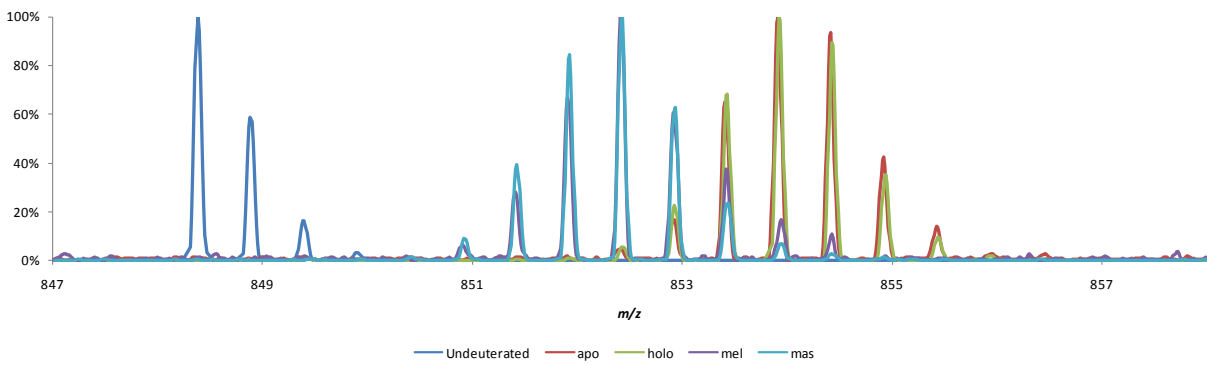

**Figure S-3:** Local H/DX kinetics experiments in the regions with little change in D uptake. Peptide 12-18 represents part of the N-terminal tail, 69-72 the beginning of the central  $\alpha$ -helix, 117-128 is part of EF hand 4, and 141-148 is the C-terminal tail. Four states of CaM are shown: CaM with no  $\text{Ca}^{2+}$  (squares), CaM with 2 mM  $\text{Ca}^{2+}$  (diamonds), 2.9:1 melittin:CaM with 2 mM  $\text{Ca}^{2+}$  (triangles), 2.9:1 mastoparan:CaM with 2 mM  $\text{Ca}^{2+}$  (circles) and 2.9:1 MLCK:CaM with 2mM  $\text{Ca}^{2+}$  (open squares).

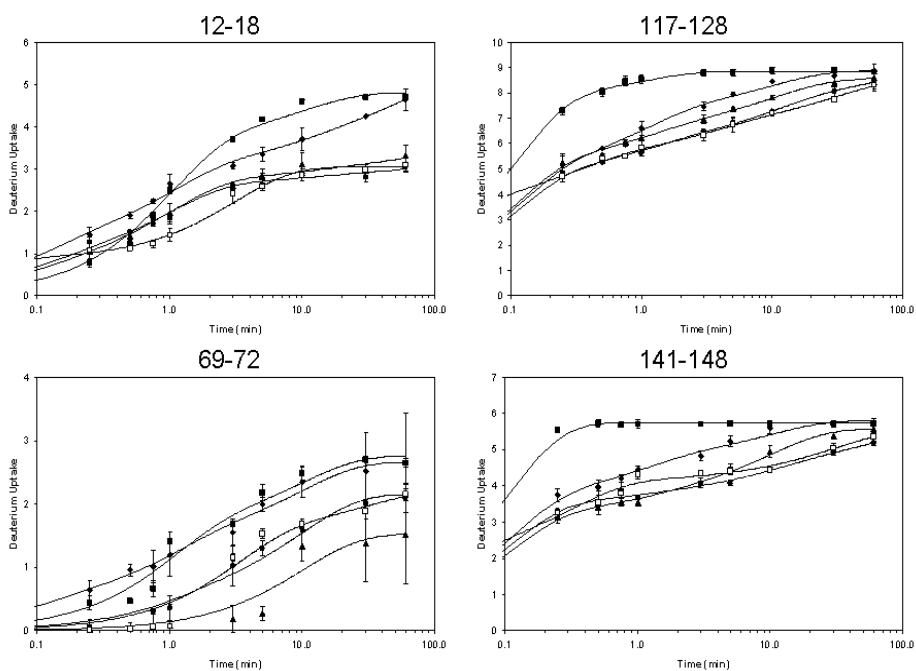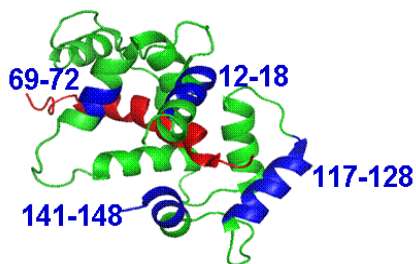

**Figure S-4:** CaM fractional species output from the PLIMSTEX modeling. A. Titration of CaM with  $\text{Ca}^{2+}$ , B. 2.9:1 MEL:CaM titrated with  $\text{Ca}^{2+}$ , and C. 2.9:1 MAS:CaM titrated with  $\text{Ca}^{2+}$ . The CaM: $3\text{Ca}^{2+}$  and  $4\text{Ca}^{2+}$  states are the dominant species in A. The CaM: $2\text{Ca}^{2+}$  and  $4\text{Ca}^{2+}$  states are the dominant species in B and C.

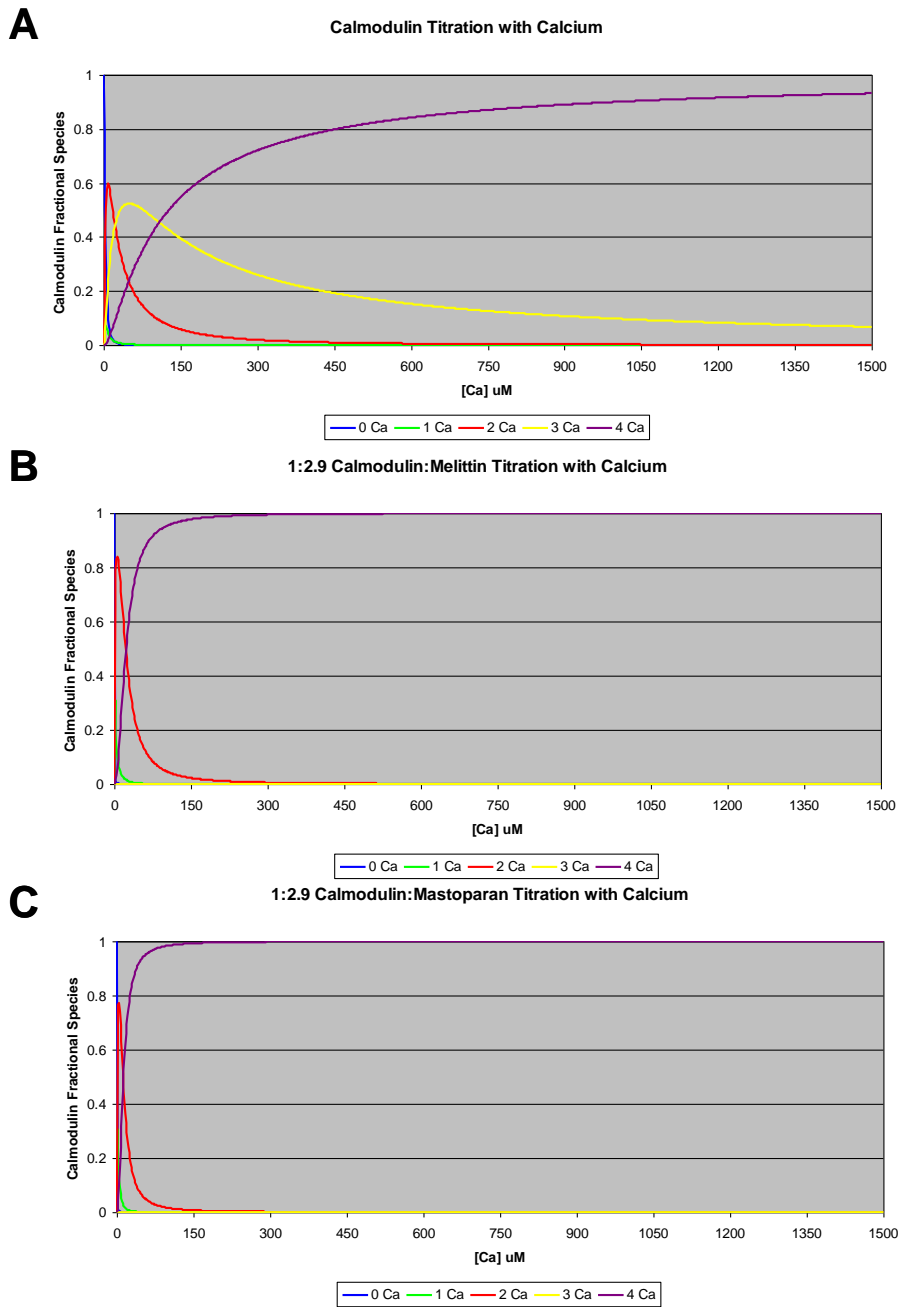

**Figure S-5:** High resolution titration experiments of EF hands 1, 3, and 4: calmodulin titrated with  $\text{Ca}^{2+}$  (squares), 2.9:1 melittin:calmodulin titrated with  $\text{Ca}^{2+}$  (diamonds), and 2.9:1 mastoparan:calmodulin titrated with  $\text{Ca}^{2+}$  (circles). H/D exchange was conducted at a constant 10 min with 97%  $\text{D}_2\text{O}$ , 10 mM HEPES (pH 7.4), 150 mM KCl, and 2.9  $\mu\text{M}$  calmodulin. Peptide 19-36 represents EF hand 1, 85-102 EF hand 3, and 125-138 EF hand 4.

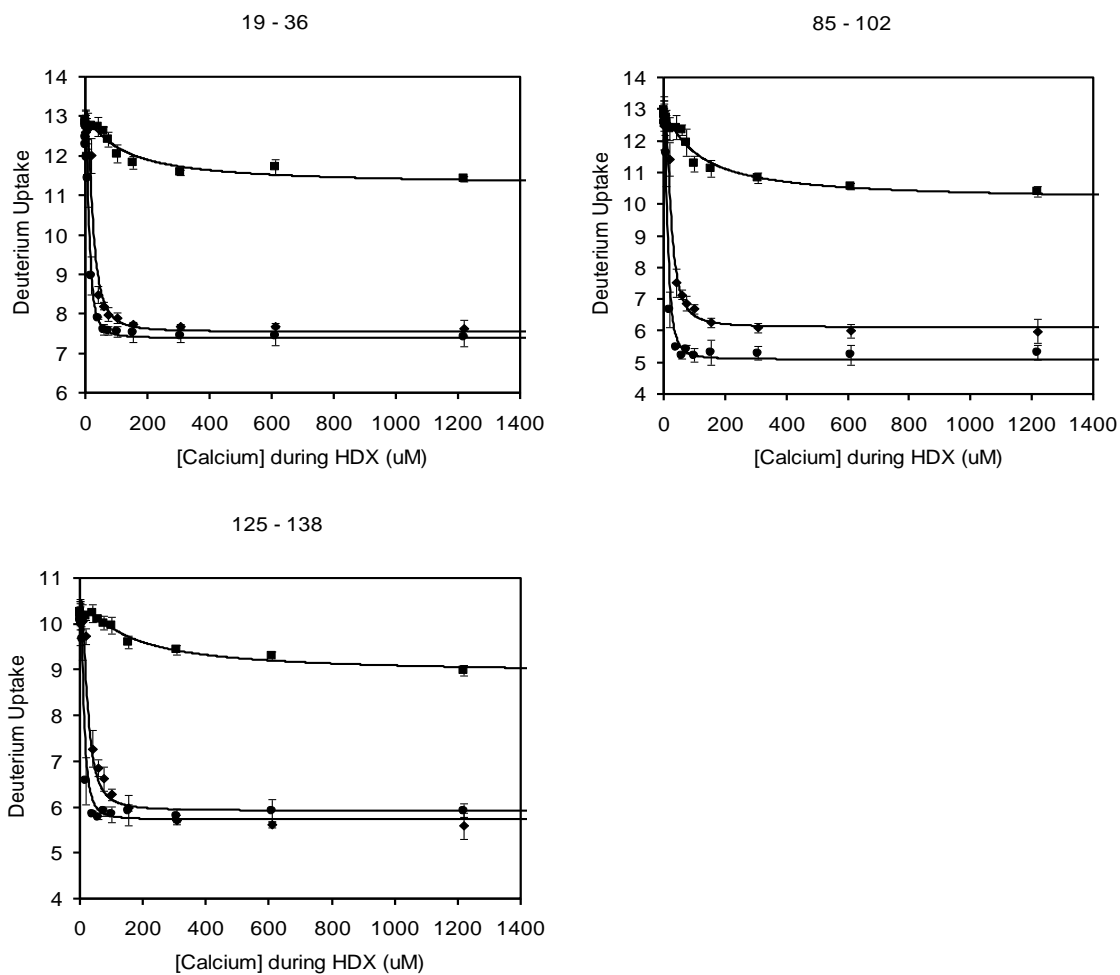

**Figure S-6.** High resolution titration experiments of the linker regions between EF hands 1 and 2 (peptide 37-48) and 3 and 4 (peptides 103-112, 103-119, and 103-120): calmodulin titrated with  $\text{Ca}^{2+}$  (squares), 2.9:1 melittin:calmodulin titrated with  $\text{Ca}^{2+}$  (diamonds), and 2.9:1 mastoparan:calmodulin titrated with  $\text{Ca}^{2+}$  (circles). H/D exchange was conducted at a constant 10 min with 97%  $\text{D}_2\text{O}$ , 10 mM HEPES (pH 7.4), 150 mM KCl, and 2.9  $\mu\text{M}$  calmodulin.

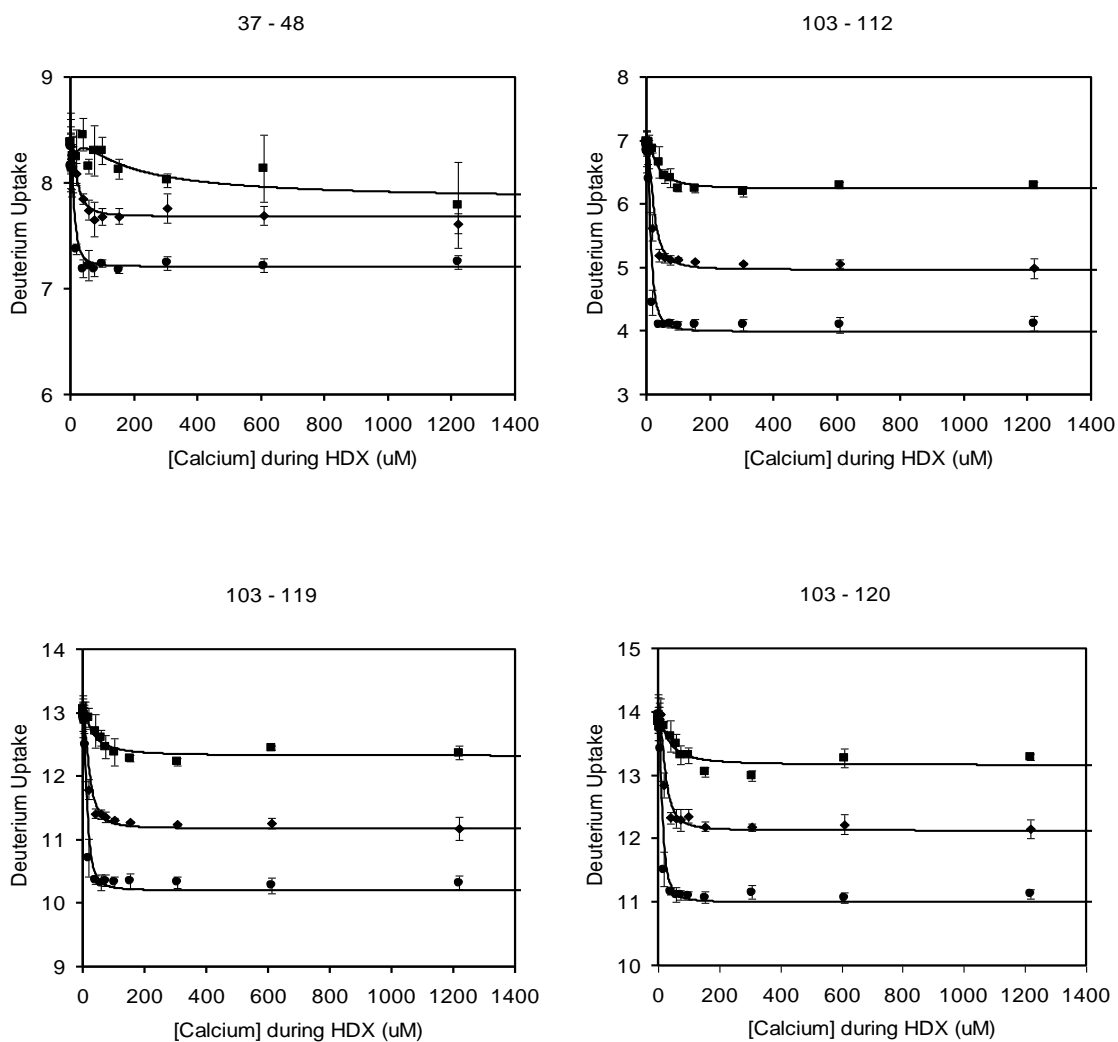

Supplement: NIHMS241969-supplement-01.pdf [file NIHMS241969-supplement-01.pdf]
